# Supplementary material
Source: bioRxiv or medRxiv preprint supplement (https://medrxiv.org/content/medrxiv/early/2024/04/02/2024.03.30.24305001/DC2/embed/media-2.pdf)
Supplement: Supplementary file [file media-2.pdf]

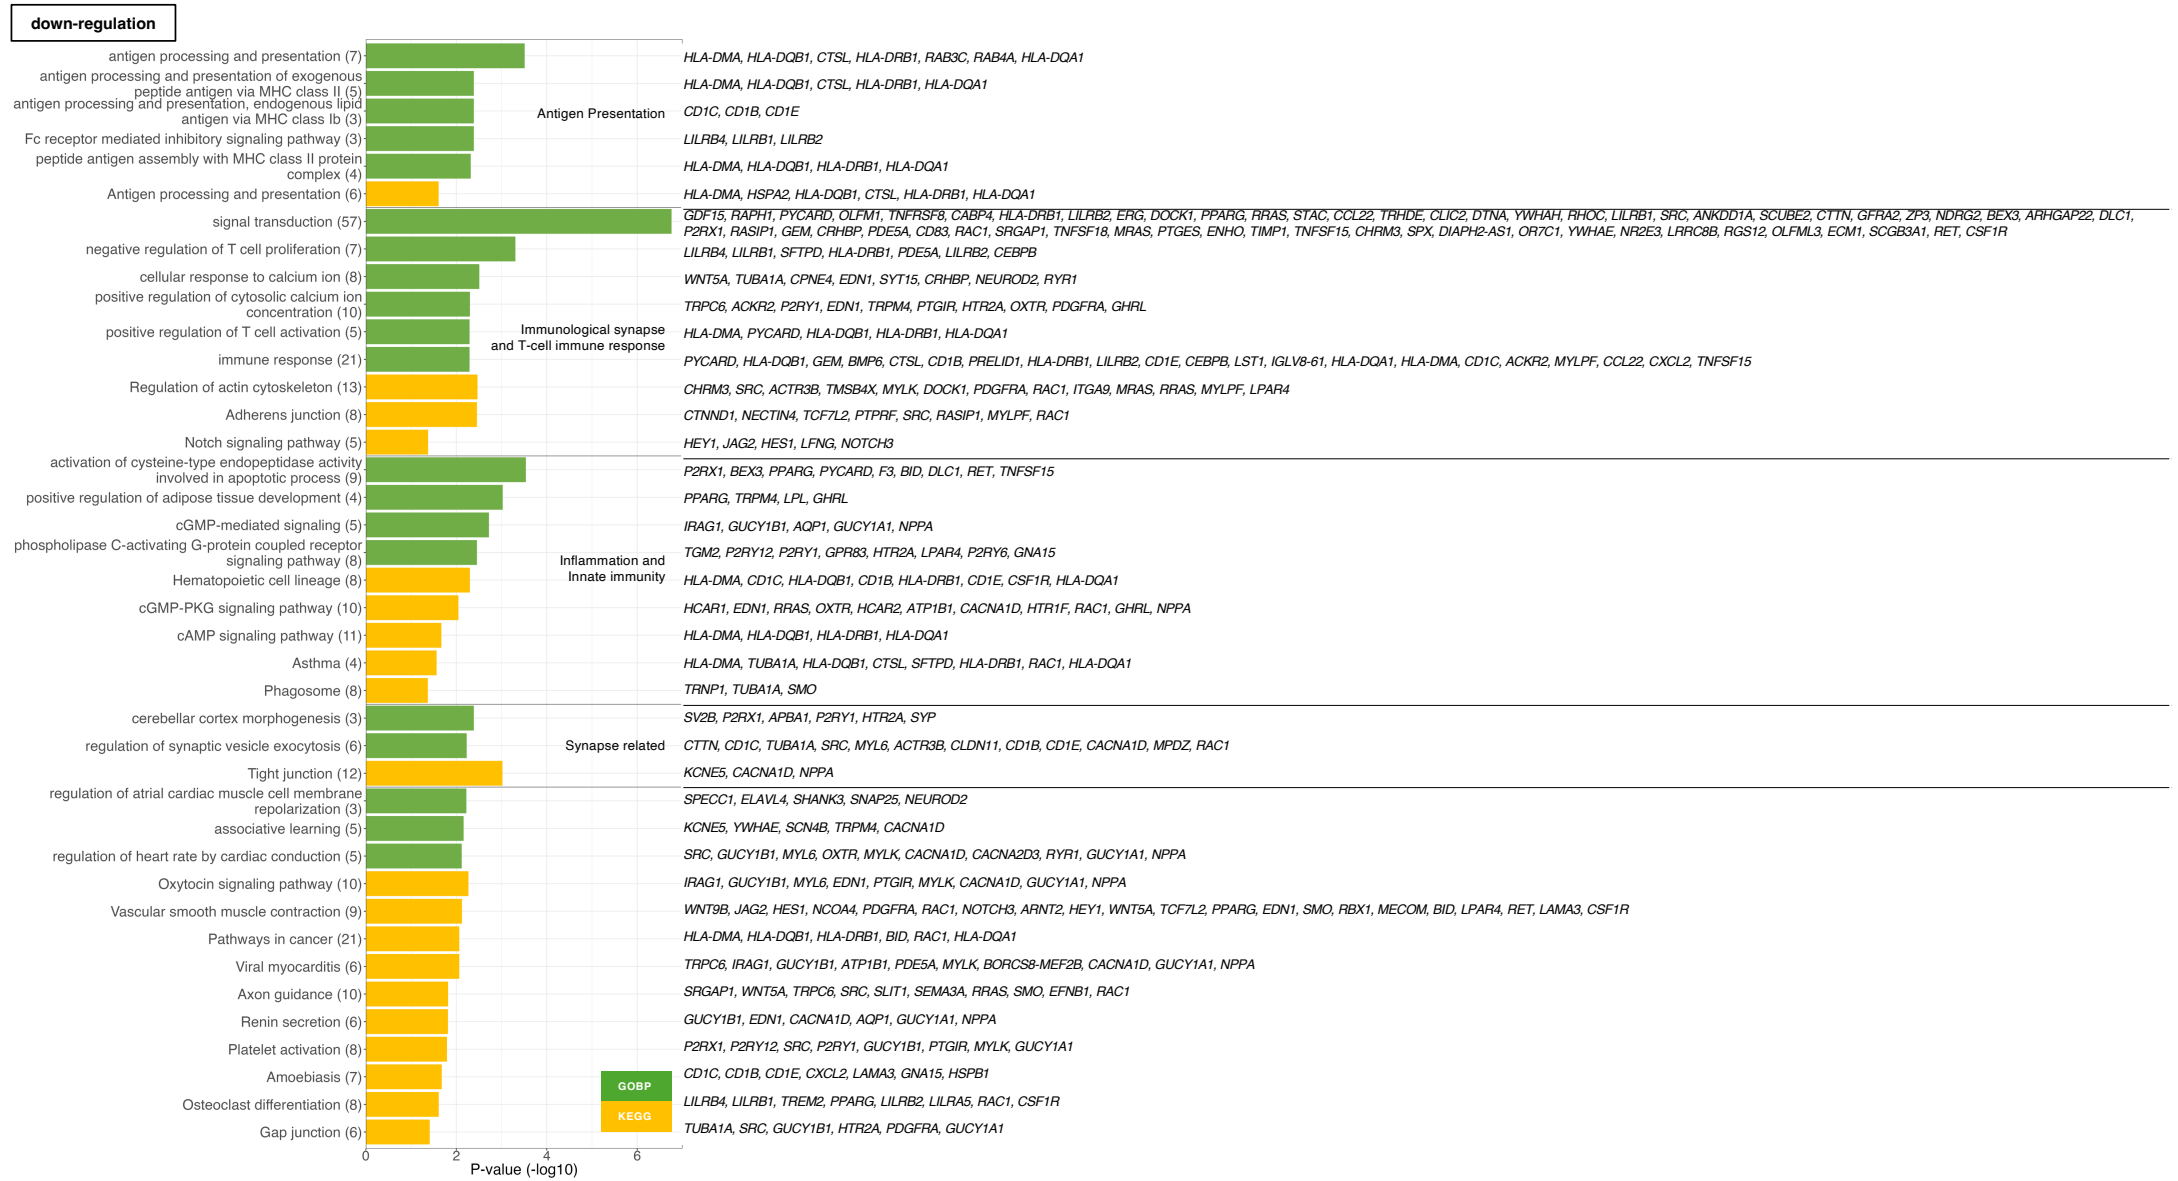

**Supplementary Figure 2. Bar chart of enrichment analysis of biological process gene ontology and KEGG pathway terms using down-regulated genes in BMT.**
